# Supplementary material for: Synthesis of hyacinthacine B3and purported hyacinthacine B7
Source: Royal Society of Chemistry journal article supplement (doi:10.1039/b918233k), 2009-12-01
Supplement: b918233k.pdf [file b918233k.pdf]

## Electronic Supplementary Information

### Synthesis of Hyacinthacine B<sub>3</sub> and purported Hyacinthacine B<sub>7</sub>

Christopher W. G. Au,<sup>a</sup> Robert J. Nash<sup>b</sup> and Stephen G. Pyne<sup>\*a</sup>

<sup>a</sup> School of Chemistry, University of Wollongong, Wollongong, New South Wales, 2522, Australia. Fax: +612 42214287; Tel: +612 42213511; E-mail: spyne@uow.edu.au

<sup>b</sup> Phytoquest Limited, IBERS, Plas Gogerddan, Aberystwyth, Ceredigion, SY23 3EB, U.K.

#### TABLE OF CONTENTS

|                                                                                                                                                                                  |               |
|----------------------------------------------------------------------------------------------------------------------------------------------------------------------------------|---------------|
| <b>General methods</b>                                                                                                                                                           | SI-2          |
| <b>Experimental for the Synthesis of Hyacinthacine B<sub>3</sub></b>                                                                                                             | SI-2 – SI-15  |
| <sup>1</sup> H NMR (500 MHz, CD <sub>3</sub> OD) of hyacinthacine B <sub>3</sub>                                                                                                 | SI-16         |
| <sup>13</sup> C NMR (500 MHz, CD <sub>3</sub> OD) of hyacinthacine B <sub>3</sub>                                                                                                | SI-17         |
| Table 1. Comparison of literature <sup>13</sup> C NMR chemical shifts (125 MHz, CD <sub>3</sub> OD) of natural hyacinthacine B <sub>3</sub> (Lit.) and synthetic <b>2</b> (Syn.) | SI-17         |
| <b>Experimental for the Synthesis of Purported Hyacinthacine B<sub>7</sub></b>                                                                                                   | SI-18 – SI-27 |
| <sup>1</sup> H NMR (500 MHz, D <sub>2</sub> O) of purported hyacinthacine B <sub>7</sub>                                                                                         | SI-28         |
| <sup>13</sup> C NMR (500 MHz, D <sub>2</sub> O) of purported hyacinthacine B <sub>7</sub>                                                                                        | SI-28         |
| NOESY (500 MHz, D <sub>2</sub> O) of purported hyacinthacine B <sub>7</sub>                                                                                                      | SI-29         |
| Table 2. Comparison of literature <sup>1</sup> H NMR chemical shifts (500 MHz, D <sub>2</sub> O) of natural hyacinthacine B <sub>7</sub> (Lit.) and synthetic <b>3</b> (Syn.)    | SI-30         |
| Table 3. Comparison of literature <sup>13</sup> C NMR chemical shifts (125 MHz, D <sub>2</sub> O) of natural hyacinthacine B <sub>7</sub> (Lit.) and synthetic <b>3</b> (Syn.)   | SI-30         |

### General Methods:

Unless otherwise indicated all  $^1\text{H}$  (500 MHz) and  $^{13}\text{C}$  NMR (125 MHz) spectra were recorded in  $\text{CDCl}_3$  solutions. All signals were relative to TMS or  $\text{CDCl}_3$ , referenced at 0.00 ppm or 77.0 ppm. NMR assignments are based upon COSY, DEPT, HSQC and HMBC experiments. Petrol refers to the hydrocarbon fraction of bp 40-60 °C

### Experimental for the Synthesis of hyacinthacine B<sub>3</sub>

#### General Method for *O*-PMB Protection:

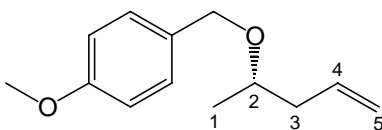

**1-Methoxy-4-[[*(2S)*-pent-4-en-2-yloxy]methyl]benzene (5a).** A solution of (*S*)-4-penten-2-ol **4a** (1.070 g, 12.423 mmol,  $[\alpha]_D^{24} +5.0$  (neat), > 98% ee, Aldrich), 4-methoxybenzyl chloride (3.15 mL, 23.220 mmol) and tetrabutylammonium iodide (0.369 g, 1.161 mmol) in anhydrous THF (40 mL) under a  $\text{N}_2$  atmosphere was cooled to 0 °C, sodium hydride (50% dispersion in mineral oil, 0.836 g, 0.418 g NaH, 17.415 mmol) was then added, and the reaction mixture was allowed to warm to rt and stirred under nitrogen for 18 h. Quenching with  $\text{H}_2\text{O}$  (30 mL) gave a cloudy mixture, which was extracted with diethyl ether (30 mL). The aqueous layer was further extracted with diethyl ether (3 x 30 mL), and the combined ethereal extracts were washed with brine, dried ( $\text{MgSO}_4$ ) and concentrated *in vacuo* to give a brown oil. Purification by flash column chromatography (increasing polarity from 0:100 to 5:95  $\text{Et}_2\text{O}$ /petrol) gave the title compound as a colorless oil (2.309 g, 90%).  $R_f$  0.43 (5:95  $\text{EtOAc}$ /petrol).  $[\alpha]_D^{24} +8.0$  ( $c$  1.00,  $\text{CHCl}_3$ ).  $\delta_{\text{H}}$  (500 MHz): 7.26 (2H, d,  $J = 8.8$  Hz, ArH), 6.86 (2H, d,  $J = 8.8$  Hz, ArH), 5.87-5.78 (2H, m, H4), 5.07 (1H, d,  $J = 17.3$  Hz,  $\text{H5}_{\text{trans}}$ ), 5.04 (1H, d,  $J = 10.7$  Hz,  $\text{H5}_{\text{cis}}$ ), (1H, d,  $J =$

17.3 Hz, H5<sub>trans</sub>), 4.48 (1H, d,  $J = 11.5$  Hz, OCHHPMP), 4.27 (1H, d,  $J = 11.5$  Hz, OCHHPMP), 3.77 (3H, s, OCH<sub>3</sub>), 3.58-3.52 (1H, m, H2), 2.36 (1H, ddd,  $J = 5.9, 6.6, 13.7$  Hz, H3<sub>A</sub>), 2.21 (1H, ddd,  $J = 6.7, 7.1, 13.9$  Hz, H3<sub>B</sub>), 1.17 (3H, d,  $J = 6.1$  Hz, H1)  
 $\delta_C$  (125 MHz): 159.0 (ArC), 135.0 (C4), 130.9 (ArC), 129.0 (ArC), 116.6 (C5), 113.6 (ArC), 74.0 (C2), 69.9 (OCH<sub>2</sub>PMP), 55.1 (OCH<sub>3</sub>), 40.8 (C3), 19.3 (C1).

### General Method for Olefin Cross Metathesis using the Grubb's II Catalyst:

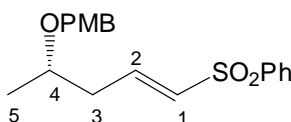

**(1E,4S)-4-[(4-Methoxybenzyl)oxy]pent-1-en-1-yl phenyl sulfone (6a).** To a nitrogen-flushed solution of **5a** (100 mg, 0.483 mmol) and phenyl vinyl sulfone (0.163 g, 0.966 mmol) in anhydrous CH<sub>2</sub>Cl<sub>2</sub> (3 mL) was added the Grubbs II catalyst (21 mg, 0.0242 mmol). The reaction mixture was stirred and irradiated with microwaves in a CEM microwave reactor for 1 h at 90 °C using a maximum applied power of 200 W. After cooling the reaction mixture was concentrated *in vacuo* to give a black semi-solid. Purification by flash column chromatography (increasing polarity from 1:10:2 to 1:5:2 Et<sub>2</sub>O/petrol/CH<sub>2</sub>Cl<sub>2</sub> as eluent) gave the title compound (0.114g, 68%) as a pale yellow oil.  $R_f$  0.52 (1:5:2 Et<sub>2</sub>O/petrol/CH<sub>2</sub>Cl<sub>2</sub>).  $[\alpha]_D^{22}$  -6.7 ( $c$  2.90, CHCl<sub>3</sub>). IR  $\nu_{\max}$  (cm<sup>-1</sup>): 2965, 2909, 2832, 1613, 1511, 1444, 1305, 1246, 1144, 1085, 1031, 750.  $\delta_H$  (300 MHz): 7.87-7.84 (2H, m, ArH), 7.60-7.48 (3H, m, ArH), 7.20-7.17 (2H, m, ArH), 7.01 (1H, dt,  $J = 7.4, 15.0$  Hz, H2), 6.86-6.83 (2H, m, ArH), 6.37 (1H, dt,  $J = 1.4, 15.0$  Hz, H1), 4.48 (1H, d,  $J = 11.2$  Hz, OCHHAr), 4.34 (1H, d,  $J = 11.2$  Hz, OCHHAr), 3.80 (3H, s, OCH<sub>3</sub>), 3.65 (1H, dq,  $J = 6.2, 12.4$  Hz, H4), 2.46-2.39 (2H, m, H3), 1.20 (3H, d,  $J = 6.2$  Hz, H5).  $\delta_C$  (75 MHz): 159.1 (ArC), 143.6 (C2), 140.5 (ArC), 133.2 (ArC), 132.0 (C1), 130.2 (ArC),

129.2 (ArC), 127.5 (ArC), 113.8(ArC), 72.5 (C4), 70.1 (O-CH<sub>2</sub>-Ar), 55.2 (OCH<sub>3</sub>), 38.5 (C3), 19.6 (C5). ESIMS *m/z* 364 (100%) [MNH<sub>4</sub>]<sup>+</sup>, 369 (12%) [MNa]<sup>+</sup>, HRESIMS found 369.1151, calc for C<sub>19</sub>H<sub>22</sub>O<sub>4</sub>NaS, 369.1137 [MNa]<sup>+</sup>.

### General Method for the Sharpless Asymmetric Dihydroxylation using DHQD-IND:

To a solution of potassium ferric cyanide (0.322 g, 0.977 mmol), potassium carbonate (0.135 g, 0.977 mmol), methanesulfonamide (0.031 g, 0.326 mmol), potassium osmate dihydrate (1.4 mg, 0.0039 mmol) and DHQD-IND (2.3 mg, 0.0049 mmol) in H<sub>2</sub>O (1.5 mL) was added a solution of **6a** (0.113 g, 0.326 mmol) in *tert*-butanol (1.5 mL). The reaction mixture was agitated with ultrasound waves in a sonicator fitted with a water bath for 6 h, stirred at rt for 12 h and then sonicated again for an additional 6 h. The mixture was diluted with H<sub>2</sub>O (10 mL) and extracted with EtOAc (3 x 10 mL). The combined organic layers were dried and concentrated *in vacuo* to afford a yellow oil, which was used unpurified in the subsequent Petasis reaction.

### General Method for the Petasis Reaction

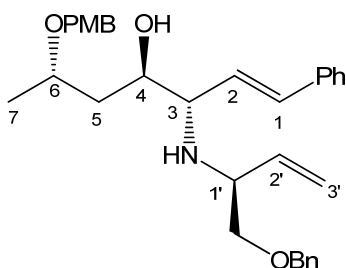

**(3S,4R,6S,E)-3-((S)-1-(Benzyloxy)but-3-en-2-ylamino)-6-(4-methoxybenzyloxy)-1-phenylhept-1-en-4-ol (9a)**. To a stirred solution of the crude Sharpless ADH product in dry CH<sub>2</sub>Cl<sub>2</sub> (2 mL) with stirring under a nitrogen atmosphere was added (*E*)-2-

phenylvinylboronic acid (0.058 g, 0.326 mmol) and (2*S*)-1-(benzyloxy)but-3-en-2-amine (0.048 g, 0.326 mmol). The reaction mixture was stirred at rt for 48 h, diluted with EtOAc (10 mL) and washed with 0.5 M aq NaOH (3 x 10 mL). The organic layer was dried (MgSO<sub>4</sub>) and concentrated *in vacuo* to give a black oil. Purification by flash column chromatography (2.5:97.5 to 5:95 MeOH/CH<sub>2</sub>Cl<sub>2</sub> as eluent) gave the title compound (0.087 g, 53%, over 2 steps) as a brown oil. *R<sub>f</sub>* 0.25 (5:95 MeOH/CH<sub>2</sub>Cl<sub>2</sub>).  $[\alpha]_D^{24} +18.2$  (*c* 1.00, CHCl<sub>3</sub>). IR  $\nu_{\max}$  (cm<sup>-1</sup>): 3421, 3078, 3027, 2965, 2909, 2852, 1613, 1512, 1444, 1247, 1085, 1034.  $\delta_{\text{H}}$  (500 MHz): 7.36-7.19 (12H, m, ArH), 6.85-6.79 (2H, m, ArH), 6.43 (1H, d, *J* = 16.0 Hz, H1), 6.09 (1H, dd, *J* = 8.5, 16.0 Hz, H2), 5.59 (1H, ddd, *J* = 7.7, 9.9, 17.4 Hz, H2'), 5.22-5.15 (2H, m, H3'), 4.55-4.36 (4H, m, OCH<sub>2</sub>Ph and OCH<sub>2</sub>PMP), 4.02 (td, *J* = 3.8, 6.3 Hz, H4), 3.88-3.78 (1H, m, H6), 3.77 (3H, s, OCH<sub>3</sub>), 3.24 (1H, dd, *J* = 3.8, 8.5 Hz, H3), 3.50-3.40 (3H, m, H1' and H1''), 1.57 (2H, dd, *J* = 5.7, 6.3 Hz, H5), 1.21 (3H, d, *J* = 6.2 Hz, H7).  $\delta_{\text{C}}$  (125 MHz): 159.1 (ArC), 138.1 (ArC), 137.8 (C2'), 136.9 (ArC), 135.3 (ArC), 132.9 (C1), 130.9 (ArC), 129.3 (ArC), 128.5 (ArC), 128.4 (ArC), 127.9 (C2), 127.6 (ArC), 127.4 (ArC), 126.4 (ArC), 118.0 (C3'), 113.8 (ArC), 73.3 (C1''), 73.0 (OCH<sub>2</sub>PMP), 72.1 (C6), 70.4 (OCH<sub>2</sub>Bn), 70.2 (C4), 62.3 (C3), 58.0 (C1'), 55.3 (OCH<sub>3</sub>), 40.1 (C5), 19.7 (C7). ESIMS *m/z* 502 (100%) [MH]<sup>+</sup>, HRESIMS found 502.2954, calc for C<sub>32</sub>H<sub>40</sub>NO<sub>4</sub>, 502.2957 [MH]<sup>+</sup>.

### General Method for the Synthesis of Oxazolidinones

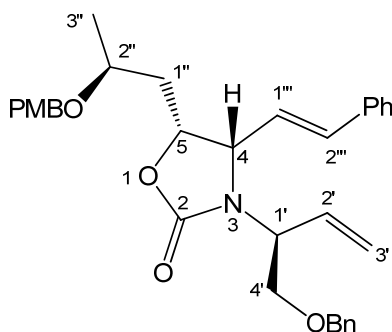

**(4S,5R)-3-((S)-1-(Benzyloxy)but-3-en-2-yl)-5-((S)-2-(4-methoxybenzyloxy)propyl)-4-styryloxazolidin-2-one (10a).** To solution of the 1,2-amino alcohol **9a** (0.020 g, 0.040 mmol) and triethylamine (11  $\mu$ L, 0.080 mmol) in anhydrous  $\text{CH}_2\text{Cl}_2$  (3 mL) at 0  $^\circ\text{C}$  was added triphosgene (6 mg, 0.020 mmol). The reaction mixture was allowed to warm to rt and was stirred for 18 h and then concentrated *in vacuo* to give a yellow solid. Purification by flash column chromatography using  $\text{Et}_2\text{O}/\text{CH}_2\text{Cl}_2$  (1:30) as eluent gave the title compound (0.017 g, 81%) as a colorless oil.  $R_f$  0.39 (1:3 EtOAc/petrol).  $[\alpha]_D^{21} +3.6$  ( $c$  8.30,  $\text{CHCl}_3$ ). IR  $\nu_{\text{max}}$  ( $\text{cm}^{-1}$ ): 2970, 2924, 2847, 1746, 1513, 1247, 1073.  $\delta_{\text{H}}$  (300 MHz): 7.33-7.24 (12H, m, ArH), 6.88-6.85 (2H, m, ArH), 6.30 (1H, d,  $J = 16.2$  Hz, H2'') 5.82 (1H, ddd,  $J = 7.2, 10.1, 17.6$  Hz, H2'), 6.00 (1H, dd,  $J = 9.3, 15.9$  Hz, H1'''), 5.25 (1H, d,  $J = 17.2$  Hz, H3' *trans*), 5.18 (1H, dd,  $J = 10.4$  Hz, H3' *cis*), 4.86 (1H, ddd,  $J = 2.6, 8.1, 10.7$  Hz, H5), 4.61 (1H, d,  $J = 11.7$  Hz, OCHHPh), 4.52 (1H, d,  $J = 10.7$  Hz, OCHHPMP), 4.48 (1H, d,  $J = 11.7$  Hz, OCHHPh), 4.41-4.32 (1H, m, H4), 4.39-4.32 (1H, m, H1'), 4.34 (1H, d,  $J = 10.7$  Hz, OCHHPMP), 3.90-3.76 (1H, m, H2''), 3.90-3.76 (1H, m, H4' <sub>A</sub>), 3.79 (3H, s, OCH<sub>3</sub>), 3.61 (1H, dd,  $J = 5.4, 10.2$  Hz, H4' <sub>B</sub>), 1.74-1.55 (2H, m, H1'''), 1.19 (3H, d,  $J = 6.3$  Hz, H3'').  $\delta_{\text{C}}$  (75 MHz): 159.2 (ArC), 157.4 (CO), 137.8 (ArC), 135.6 (ArC), 135.0 (C2'''), 133.6 (C2'), 130.6 (ArC), 128.4 (ArC), 128.6 (ArC),

128.4 (ArC), 128.3 (ArC), 127.9 (ArC), 127.8 (ArC), 126. (ArC), 124.9 (C1'''), 118.4 (C3'), 113.8 (ArC), 74.6 (C5), 73.0 (OCH<sub>2</sub>Ph), 71.3 (C2''), 70.9 (OCH<sub>2</sub>PMP), 68.9 (C4'), 61.3 (C4), 56.2 (C1'), 55.3 (OCH<sub>3</sub>), 38.7 (C1''), 20.1 (C3''). ESIMS *m/z* 550 (80%) [MNa]<sup>+</sup>, 528 (18%) [MH]<sup>+</sup>, HRESIMS found 528.2737, calc for C<sub>33</sub>H<sub>38</sub>NO<sub>5</sub>, 528.2750 [MH]<sup>+</sup>.

### General Method for Ring-Closing Metathesis of Oxazolidinones

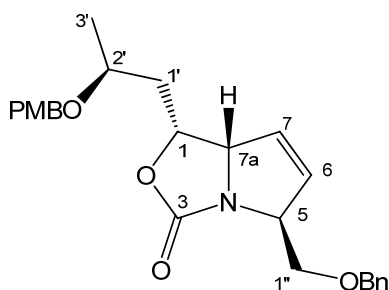

**(1R,5S,7aS)-5-(Benzyloxymethyl)-1-((S)-2-(4-methoxybenzyloxy)propyl)-1,7a-dihydropyrrolo[1,2-c]oxazol-3(5H)-one (11a).** To a nitrogen-flushed solution of the oxazolidinone **10a** (0.165 g, 0.313 mmol) in anhydrous CH<sub>2</sub>Cl<sub>2</sub> (3 mL) was added Grubbs II catalyst (13 mg, 0.0157 mmol). The reaction mixture was stirred and irradiated with microwaves in a CEM microwave reactor for 1 h at 90 °C using a maximum applied power of 200 W. After cooling the reaction mixture was concentrated *in vacuo* to give a black semi-solid. Purification by flash column chromatography using EtOAc/petrol (3:7) as eluent gave the title compound (0.100 g, 76%) as a yellow oil. *R<sub>f</sub>* 0.25 (1:3 EtOAc/petrol).  $[\alpha]_D^{24}$  -32.4 (c 1.00, CHCl<sub>3</sub>). IR  $\nu_{\max}$  (cm<sup>-1</sup>): 2970, 2929, 2858, 1752, 1513, 1375, 1248, 1030.  $\delta_{\text{H}}$  (500 MHz): 7.35-7.24 (7H, m, ArH), 6.92-6.86 (2H, m, ArH), 6.01 (1H, dd, *J* = 2.3, 6.0 Hz, H7), 5.91 (1H, dd, *J* = 1.1, 6.1 Hz, H6), 5.00 (1H, dt, *J* = 3.4, 8.9 Hz, H1), 4.82-4.77 (2H, m, H7a and H5), 4.58 (1H, d, *J* = 12.0 Hz, OCHHPMP), 4.56

(1H, d,  $J = 10.8$  Hz, OCHHPPh), 4.54 (1H, d,  $J = 12.0$  Hz, OCHHPMP), 4.34 (1H, d,  $J = 10.8$  Hz, OCHHPPh), 3.81-3.76 (1H, m, H2'), 3.80 (3H, s, OCH<sub>3</sub>), 3.54 (2H, dd,  $J = 2.1, 5.0$  Hz, H1''), 1.73 (1H, ddd,  $J = 3.6, 10.3, 14.3$  Hz, H1'<sub>A</sub>), 1.62 (1H, ddd,  $J = 2.8, 9.7, 14.3$  Hz, H1'<sub>B</sub>), 1.22 (3H, d,  $J = 6.0$  Hz, H3').  $\delta_C$  (125 MHz): 162.4 (ArC), 159.2 (C3), 137.9 (ArC), 132.8 (C7), 130.5 (ArC), 129.4 (ArC), 128.4 (ArC), 128.4 (C6), 127.6 (ArC), 127.5 (ArC), 113.9 (ArC), 76.3 (C1), 73.2 (OCH<sub>2</sub>PMP), 71.3 (C1''), 71.1 (C2'), 70.8 (OCH<sub>2</sub>Ph), 68.2 (C5), 66.8 (C7a), 55.1 (OCH<sub>3</sub>), 40.0 (C1'), 19.9 (C3'). ESIMS  $m/z$  446 (100%) [MNa]<sup>+</sup>, HRESIMS found 446.1956 calc for C<sub>25</sub>H<sub>29</sub>NO<sub>5</sub>Na, 424.2124 [MNa]<sup>+</sup>.

### General Method for *Syn*-Dihydroxylation

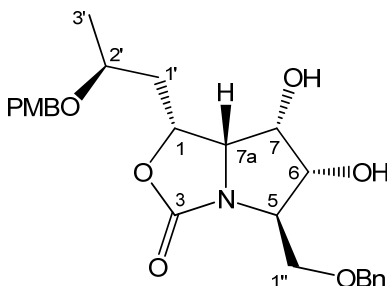

**(1R,5R,6R,7S,7aS)-5-(Benzyloxymethyl)-6,7-dihydroxy-1-((S)-2-(4-methoxybenzyloxy)propyl)tetrahydropyrrolo[1,2-c]oxazol-3(1H)-one (12a).** To a solution of the alkene **11a** (0.600 g, 1.420 mmol) in 3:2 acetone/water (20 mL) was added *N*-morpholine-*N*-oxide (0.333 g, 2.840 mmol) and potassium osmate dihydrate (26 mg, 0.071 mmol). The reaction mixture was stirred at rt for 18 h, diluted with H<sub>2</sub>O and extracted with EtOAc (3 x 20 mL). The combined organic layers were dried (MgSO<sub>4</sub>) and concentrated *in vacuo* to afford a black oil. Purification by flash column chromatography (increasing polarity from 0:100 to 5:95 MeOH/CH<sub>2</sub>Cl<sub>2</sub> as eluent) gave



the title compound (0.572 g, 88%) as a brown oil.  $R_f$  0.26 (1:1 EtOAc/petrol).  $[\alpha]_D^{24} +2.0$  ( $c$  1.00,  $\text{CHCl}_3$ ). IR  $\nu_{\text{max}}$  ( $\text{cm}^{-1}$ ): 3421, 2934, 2909, 2863, 1727, 1513, 1247, 1123, 1061.  $\delta_{\text{H}}$  (500 MHz): 7.36-7.21 (7H, m, ArH), 6.86 (2H, d,  $J = 8.5$  Hz, ArH), 4.86 (1H, td,  $J = 3.9, 8.2$  Hz, H1), 4.57 (2H, q,  $J = 11.1$  Hz,  $\text{OCH}_2\text{PMP}$ ), 4.54 (1H, d,  $J = 10.8$  Hz,  $\text{OHCHPh}$ ), 4.31 (1H, d,  $J = 10.8$  Hz,  $\text{OHCHPh}$ ), 4.30-4.27 (1H, m, H7), 3.97-3.95 (1H, m, H6), 3.80-3.77 (1H, m, H5), 3.78 (3H, s,  $\text{OCH}_3$ ), 3.78-3.76 (1H, m, H2'), 3.74 (1H, dd,  $J = 3.8, 9.6$  Hz, H1''<sub>A</sub>), 3.67-3.65 (1H, m, H7a), 3.63 (1H, dd,  $J = 5.3, 9.6$  Hz, H1''<sub>B</sub>), 2.36 (1H, ddd,  $J = 2.4, 8.8, 14.6$  Hz, H1''<sub>A</sub>), 1.94 (1H, ddd,  $J = 4.0, 10.4, 14.6$  Hz, H1''<sub>B</sub>), 1.24 (3H, d,  $J = 6.0$  Hz, H3').  $\delta_{\text{C}}$  (125 MHz): 162.7 (C3), 159.2 (ArC), 137.8 (ArC), 130.5 (ArC), 129.5 (ArC), 128.4 (ArC), 127.8 (ArC), 127.6 (ArC), 113.8 (ArC), 76.3 (C7), 73.9 (C1), 73.5 (C3''), 72.3 (C6), 72.1 (C2'), 70.7 (C5'), 70.4 (1''), 65.1 (C7a), 62.3 (C5), 55.3 ( $\text{OCH}_3$ ), 37.5 (C1'), 19.9 (C3'). ESIMS  $m/z$  480 (100%)  $[\text{MNa}]^+$ , 458 (10%)  $[\text{MH}]^+$ , HRESIMS found 458.2187, calc for  $\text{C}_{25}\text{H}_{32}\text{NO}_7$ , 458.2179  $[\text{MH}]^+$ .

### General Method for Bisbenzylation of Secondary Diols

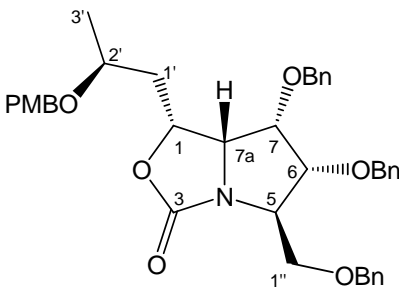

**(1R,5R,6R,7S,7aR)-6,7-Bis(benzyloxy)-5-(benzyloxymethyl)-1-((S)-2-(4-methoxybenzyloxy)propyl)tetrahydropyrrolo[1,2-c]oxazol-3(1H)-one (13a).** A solution of the diol **12a** (0.018 g, 0.0391 mmol), benzyl bromide (0.020 mL, 0.157 mmol) and tetrabutylammonium iodide (1 mg, 0.004 mmol) in anhydrous THF (5 mL) was cooled to

0 °C. To the above solution was added sodium hydride (50% dispersion in mineral oil, 6 mg, 3 mg NaH, 0.117 mmol), and the reaction mixture was allowed to warm to rt and was stirred for 18 h. Quenching with H<sub>2</sub>O gave a cloudy mixture, which was extracted with Et<sub>2</sub>O (3 x 10 mL). The combined ethereal extracts were dried (MgSO<sub>4</sub>) and concentrated *in vacuo* to give a pale yellow oil. Purification by flash column chromatography (increasing polarity from 1:9 to 1:4 EtOAc/petrol) gave the title compound (0.025 g, 100%) as a colorless oil. *R<sub>f</sub>* 0.19 (1:10 EtOAc/petrol).  $[\alpha]_D^{22} +9.3$  (*c* 1.23, CHCl<sub>3</sub>). IR  $\nu_{\max}$  (cm<sup>-1</sup>): 2929, 2858, 1750, 1516, 1239, 1096, 1067, 1028, 906.  $\delta_H$  (500 MHz): 7.35-7.19 (17H, m, ArH), 6.88-6.84 (2H, m, ArH), 5.01 (1H, d, *J* = 11.5 Hz, OCHHAr), 4.80 (1H, ddd, *J* = 4.8, 7.8, 8.0 Hz, H1), 4.63-4.50 (3H, m, 3 x OCHHAr), 4.55-4.50 (1H, m, OCHHAr), 4.43(1H, d, *J* = 16.3 Hz, OCHHAr), 4.41 (1H, d, *J* = 16.3 Hz, OCHHAr), 4.26 (1H, d, *J* = 10.6 Hz, OCHHAr), 4.18 (1H, dd, *J* = 2.7, 8.1 Hz, H6), 3.98 (1H, dt, *J* = 3.0, 8.1 Hz, H5), 3.94 (1H, t, *J* = 2.7 Hz, H7), 3.78 (3H, s, OCH<sub>3</sub>), 3.78-3.75 (1H, m, H1''<sub>A</sub>), 3.70-3.67 (1H, m, H2'), 3.65 (1H, dd, *J* = 2.7, 7.8 Hz, H7a), 3.59 (dd, *J* = 2.9, 10.3 Hz, H1''<sub>B</sub>), 2.12 (1H, ddd, *J* = 2.7, 8.3, 14.7 Hz, H1'<sub>A</sub>), 1.75 (1H, ddd, *J* = 4.7, 10.4, 14.7 Hz, H1'<sub>B</sub>), 1.09 (3H, d, *J* = 6.1 Hz, H3').  $\delta_C$  (125 MHz): 162.0 (C3), 159.2 (ArC), 138.1 (ArC), 138.0 (ArC), 137.5 (ArC), 130.5 (ArC), 129.5 (ArC), 128.5 (ArC), 128.3 (ArC), 128.2 (ArC), 127.9 (ArC), 127.6 (ArC), 127.6 (ArC), 127.4 (ArC), 127.2 (ArC), 113.8 (ArC), 83.1 (C6), 77.1 (C7), 73.8 (C1), 73.3 (OBn), 73.2 (OBn), 72.8 (OBn), 72.2 (C2), 70.7 (OPMB), 69.2 (C1''), 64.2 (C7a), 60.9 (C5), 55.2 (OCH<sub>3</sub>), 37.3 (C1'), 19.8 (C3'). ESIMS *m/z* 660 (70%) [MNa]<sup>+</sup>, 638 (3%) [MH]<sup>+</sup>, HRESIMS found 638.3093, calc for C<sub>39</sub>H<sub>44</sub>NO<sub>7</sub>, 638.3118 [MH]<sup>+</sup>.

**General Method for PMB Deprotection using DDQ.**

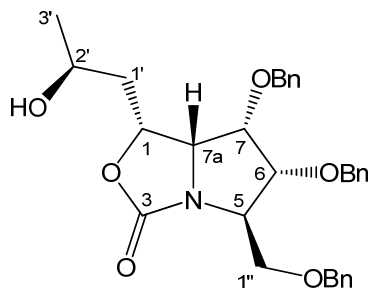

**(1R,5R,6R,7S,7aR)-6,7-Bis(benzyloxy)-5-(benzyloxymethyl)-1-((S)-2-**

**hydroxypropyl)-tetrahydropyrrolo[1,2-c]oxazol-3(1H)-one (14a).** To a solution of **13a**

(0.131 g, 0.206 mmol) in 8:1 CH<sub>2</sub>Cl<sub>2</sub>/H<sub>2</sub>O (9 mL) was added 2,3-dichloro-5,6-dicyanobenzoquinone (DDQ) (0.103 g, 0.453 mmol). The reaction mixture was stirred at rt for 4 h, when TLC analysis (EtOAc/petrol (1:1)) showed complete consumption of **13a**.

Purification by flash column chromatography (increasing polarity from 1:1 to 4:1 EtOAc/petrol as eluent) gave the title compound (0.094 g, 89%) as a yellow oil. *R<sub>f</sub>* 0.16

(1:1 EtOAc/petrol).  $[\alpha]_D^{24} +19.8$  (*c* 1.31, CHCl<sub>3</sub>). IR  $\nu_{\max}$  (cm<sup>-1</sup>): 3436, 3057, 3021, 2924,

2863, 1747, 1454, 1357, 1203.  $\delta_H$  (500 MHz): 7.37-7.19 (15H, m, ArH), 5.04 (1H, d, *J* =

11.6 Hz, OCHHPh), 4.79 (1H, td, *J* = 4.8, 8.0 Hz, H1), 4.65 (1H, d, *J* = 11.9 Hz,

OCHHPh), 4.56 (1H, d, *J* = 11.5 Hz, OCHHPh), 4.54 (1H, d, *J* = 14.0 Hz, OCHHPh),

4.51 (1H, d, *J* = 14.0 Hz, OCHHPh), 4.41 (1H, d, *J* = 11.9 Hz, OCHHPh), 4.29 (1H, dd, *J*

= 2.1, 7.9 Hz, H6), 4.05-4.02 (1H, m, H7), 4.00 (1H, dt, *J* = 3.1, 8.0 Hz, H5), 3.92 (1H,

ddd, *J* = 3.1, 6.3, 9.5 Hz, H2'), 3.76 (1H, dd, *J* = 3.2, 10.3 Hz, H1''<sub>A</sub>), 3.73 (1H, dd, *J* =

2.6, 7.6 Hz, H7a), 3.60 (1H, dd, *J* = 3.0, 10.3 Hz, H1''<sub>B</sub>), 2.10 (1H, ddd, *J* = 2.9, 8.5, 14.5

Hz, H1'<sub>A</sub>), 1.64 (1H, ddd, *J* = 4.7, 9.9, 14.5 Hz, H1'<sub>B</sub>), 1.08 (3H, d, *J* = 6.2 Hz, H3').  $\delta_C$

(125 MHz): 162.0 (C3), 138.1 (ArC), 137.9 (ArC), 137.5 (ArC), 128.5 (ArC), 128.3

(ArC), 128.3 (ArC), 127.8 (ArC), 127.6 (ArC), 127.4 (ArC), 127.3 (ArC), 83.2 (C6), 77.0

(C7), 73.8 (C1), 73.3 (OCH<sub>2</sub>Ph), 73.2 (OCH<sub>2</sub>Ph), 72.9 (OCH<sub>2</sub>Ph), 69.3 (C1''), 65.1 (CH), 64.2 (C7a), 61.0 (C5), 38.1 (C1'), 24.4 (C3'). ESIMS  $m/z$  540 (100%) [MNa]<sup>+</sup>, 518 (48%) [MH]<sup>+</sup>, HRESIMS found 518.2523, calc for C<sub>31</sub>H<sub>36</sub>NO<sub>6</sub>, 518.2543 [MH]<sup>+</sup>.

### General Method for Hydrolysis of Oxazolidinones

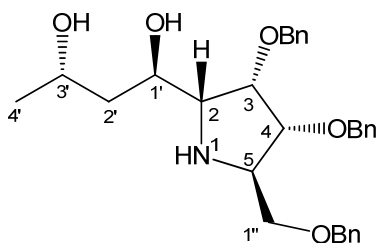

**(1R,3S)-1-((2R,3S,4R,5R)-3,4-Bis(benzyloxy)-5-(benzyloxymethyl)pyrrolidin-2-yl)butane-1,3-diol (15a).** To a solution of **14a** (0.270 g, 0.521 mmol) in ethanol (3 mL) was added sodium hydroxide (0.042 g, 1.042 mmol). The reaction mixture was stirred and irradiated with microwaves in a CEM microwave reactor for 1 h at 110 °C using a maximum applied power of 200 W. After cooling the reaction mixture was concentrated *in vacuo* to give a yellow semi-solid. Purification by flash column chromatography (increasing polarity from 2.5:97.5 to 7.5:92.5 MeOH/CH<sub>2</sub>Cl<sub>2</sub> as eluent) gave the title compound (0.216 g, 84%) as a light yellow oil.  $R_f$  0.32 (7.5:92.5 MeOH/CH<sub>2</sub>Cl<sub>2</sub>).  $[\alpha]_D^{24} +13.6$  ( $c$  1.00, CHCl<sub>3</sub>). IR  $\nu_{\max}$  (cm<sup>-1</sup>): 3359, 3088, 3062, 3032, 2955, 2893, 2858, 1147, 1085, 1049.  $\delta_H$  (500 MHz): 7.36-7.23 (15H, ArH), 4.86 (1H, d,  $J$  = 11.4 Hz, OCHHPh), 4.60 (1H, d,  $J$  = 11.9 Hz, OCHHPh), 4.55 (1H, d,  $J$  = 11.9 Hz, OCHHPh), 4.54 (1H, d,  $J$  = 11.4 Hz, OCHHPh), 4.48 (1H, d,  $J$  = 11.9 Hz, OCHHPh), 4.43 (1H, d,  $J$  = 11.9 Hz, OCHHPh), 4.14 (1H, t,  $J$  = 5.0 Hz, H3), 4.13-4.10 (1H, m, H1'), 4.01-3.93 (1H, m, H3'), 3.90 (1H, t,  $J$  = 5.0 Hz, H4), 3.54-3.46 (2H, m, H1''), 3.47-3.44 (1H, m, H5), 3.10 (1H,

dd,  $J = 5.0, 8.5$  Hz, H2), 1.73-1.60 (2H, m, H2'), 1.17 (3H, d,  $J = 6.3$  Hz, H4').  $\delta_C$  (125 MHz): 137.9 (ArC), 137.8 (ArC), 137.7 (ArC), 128.6 (ArC), 128.4 (ArC), 128.4 (ArC), 128.0 (ArC), 128.0 (ArC), 127.8 (ArC), 127.7 (ArC), 127.7 (ArC), 127.7 (ArC), 80.5 (C4), 79.9 (C3), 73.3 (OCH<sub>2</sub>Ph), 73.2 (OCH<sub>2</sub>Ph), 72.6 (OCH<sub>2</sub>Ph), 70.5 (C1'), 69.7 (C1''), 65.3 (C3'), 63.0 (C2), 60.7 (C5), 44.5 (C2'), 23.8 (C4'). ESIMS  $m/z$  492 (100%) [MH]<sup>+</sup>, HRESIMS found 492.2758, calc for C<sub>30</sub>H<sub>38</sub>NO<sub>5</sub>, 492.2750 [MH]<sup>+</sup>.

### General Method for Mesylation-Cyclization

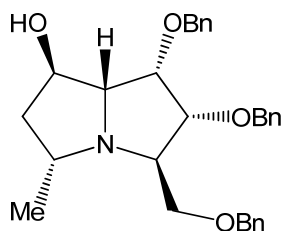

**(1R,3R,5R,6R,7S,7aR)-6,7-bis(benzyloxy)-5-(benzyloxymethyl)-3-methylhexahydro-1H-pyrrolizin-1-ol (16).** To solution of **15a** (0.130 g, 0.264 mmol) in CH<sub>2</sub>Cl<sub>2</sub> (15 mL) at 0 °C was added *via* syringe triethylamine (20.4  $\mu$ L, 0.264 mmol) and a 0.11 M solution of MeSO<sub>2</sub>Cl in CH<sub>2</sub>Cl<sub>2</sub> (2.5 mL, 0.264 mmol MeSO<sub>2</sub>Cl). The reaction mixture was stirred at 0 °C for 1.5 h and quenched with sat. NaHCO<sub>3</sub> solution (3 mL), followed by extractions with EtOAc (3 x 15 mL). The combined organic extracts were dried (MgSO<sub>4</sub>) and concentrated *in vacuo* to give a yellow oil. Purification by flash column chromatography (increasing polarity from 4:1 to 100:0 EtOAc/petrol as eluent) gave the title compound (0.079 g, 63%) as a colorless oil.  $R_f$  0.20 (4:1 EtOAc/petrol).  $[\alpha]_D^{25} +25.0$  ( $c$  1.00, CHCl<sub>3</sub>). IR  $\nu_{\max}$  (cm<sup>-1</sup>): 3380, 2955, 2919, 2858, 1362, 1127, 1096, 1055, 1024.  $\delta_H$  (500 MHz): 7.36-7.25 (15H, m, ArH), 4.73 (1H, d,  $J = 11.7$  Hz, OCHHPh), 4.67-4.63 (1H, dd,  $J = 4.4,$

10.5 Hz H7), 4.59-4.50 (5H, m, 5 x OCHHPh), 4.15 (1H, t,  $J = 4.8$  Hz, H1), 3.91 (1H, t,  $J = 4.5$  Hz, H2), 3.77 (1H, dq,  $J = 6.6, 15.6$  Hz, H5), 3.66 (1H, dd,  $J = 4.7, 7.0$  Hz, H7a), 3.48 (1H, dd,  $J = 4.2, 8.5$  Hz, H8<sub>A</sub>), 3.43-3.40 (1H, m, H3), 3.41-3.37 (1H, m, H8<sub>B</sub>), 1.90-1.86 (2H, m, H6<sub>A</sub> and H6<sub>B</sub>), 1.19 (3H, d,  $J = 6.8$  Hz, H9).  $\delta_C$  (125 MHz): 138.1 (ArC), 138.1 (ArC) 137.9 (ArC), 128.4 (ArC), 128.4 (ArC), 128.3 (ArC), 127.8 (ArC), 127.8 (ArC), 127.7 (ArC), 127.7 (ArC), 127.6 (ArC), 127.6 (ArC), 81.0 (C2), 76.2 (C1), 75.7 (C7a), 73.4 (OCH<sub>2</sub>Ph), 73.1 (OCH<sub>2</sub>Ph), 72.2 (OCH<sub>2</sub>Ph), 71.1 (C7), 71.1 (C8), 60.1 (C3), 57.1 (C5), 42.3 (C6), 16.0 (C9). ESIMS  $m/z$  474 (100%) [MH]<sup>+</sup>, HRESIMS found 474.2624, calc for C<sub>30</sub>H<sub>36</sub>NO<sub>4</sub>, 474.2644 [MH]<sup>+</sup>.

### General Method for Hydrogenolysis of Benzyl Ethers

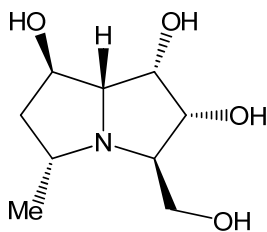

**(1S,2R,3R,5R,7R,7aR)-3-(hydroxymethyl)-5-methylhexahydro-1H-pyrrolizine-1,2,7-triol (hyacinthacine B<sub>3</sub>) (2).** To a H<sub>2</sub> flushed solution of the cyclized product **16** (17 mg, 0.036 mmol) in MeOH was added PdCl<sub>2</sub> (7 mg, 0.039 mmol). The reaction mixture was stirred at rt under a H<sub>2</sub> atmosphere (balloon) for 8 h and then filtered through a pad of celite and the solids were washed with MeOH. The combined filtrates were concentrated *in vacuo* to give a colorless film, which was dissolved in water (2 mL) and held for 15 min in a column containing Amberlyst A-26 (OH<sup>-</sup>) ion-exchange resin (1 g). Elution with water (5 x 5 mL) followed by evaporation *in vacuo* gave the title compound (5 mg, 68%)

as a colorless film.  $[\alpha]_D^{23} +10.8$  (*c* 0.33, H<sub>2</sub>O). [Lit.  $[\alpha]_D +3.3$  (*c* 0.31, H<sub>2</sub>O), temperature unknown]. IR  $\nu_{\max}$  (cm<sup>-1</sup>): 3317, 2960, 2929, 2878, 1652, 1338, 1133.  $\delta_H$  (500 MHz, CD<sub>3</sub>OD): 4.52 (1H, m, H7), 4.04 (1H, t, *J* = 4.4 Hz, H1), 3.91 (1H, dd, *J* = 4.2, 7.3 Hz, H2), 3.57 (1H, dd, *J* = 4.9, 11.0 Hz, H8<sub>β</sub>), 3.53 (1H, dd, *J* = 4.5, 11.1 Hz, H8<sub>α</sub>), 3.50 (1H, m, H5), 3.30 (1H, t, *J* = 4.6 Hz, H7a), 3.10 (1H, ddd, *J* = 4.7, 4.9 7.3 Hz, H3), 1.86-1.82 (2H, m, H6<sub>α</sub> and H6<sub>β</sub>), 1.19 (3H, d, *J* = 6.9 Hz, H9).  $\delta_C$  (75 MHz, CD<sub>3</sub>OD): 76.5 (C2), 76.2 (C7a), 71.4 (C1), 70.6 (C7), 64.2 (C8), 63.0 (C3), 56.4 (C5), 43.5 (C6), 16.7 (C9). ESIMS *m/z* 204 (100%) [MH]<sup>+</sup>, HRESIMS found 204.1297, calc for C<sub>9</sub>H<sub>18</sub>NO<sub>4</sub>, 204.1236 [MH]<sup>+</sup>.

$^1\text{H}$  NMR (500 MHz,  $\text{CD}_3\text{OD}$ ) of hyacinthacine  $\text{B}_3$

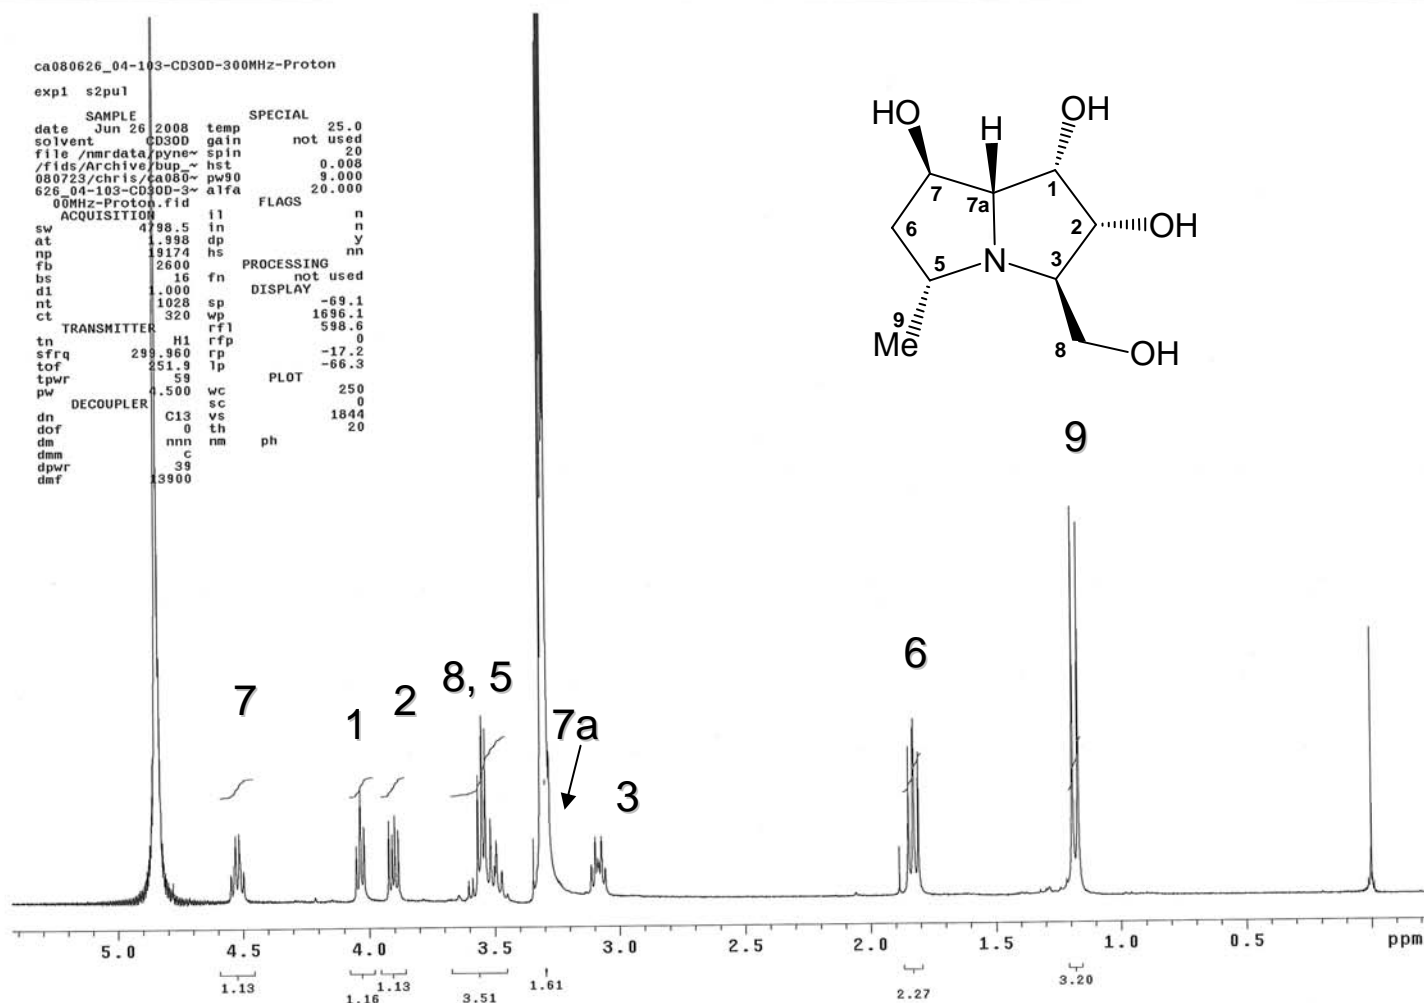



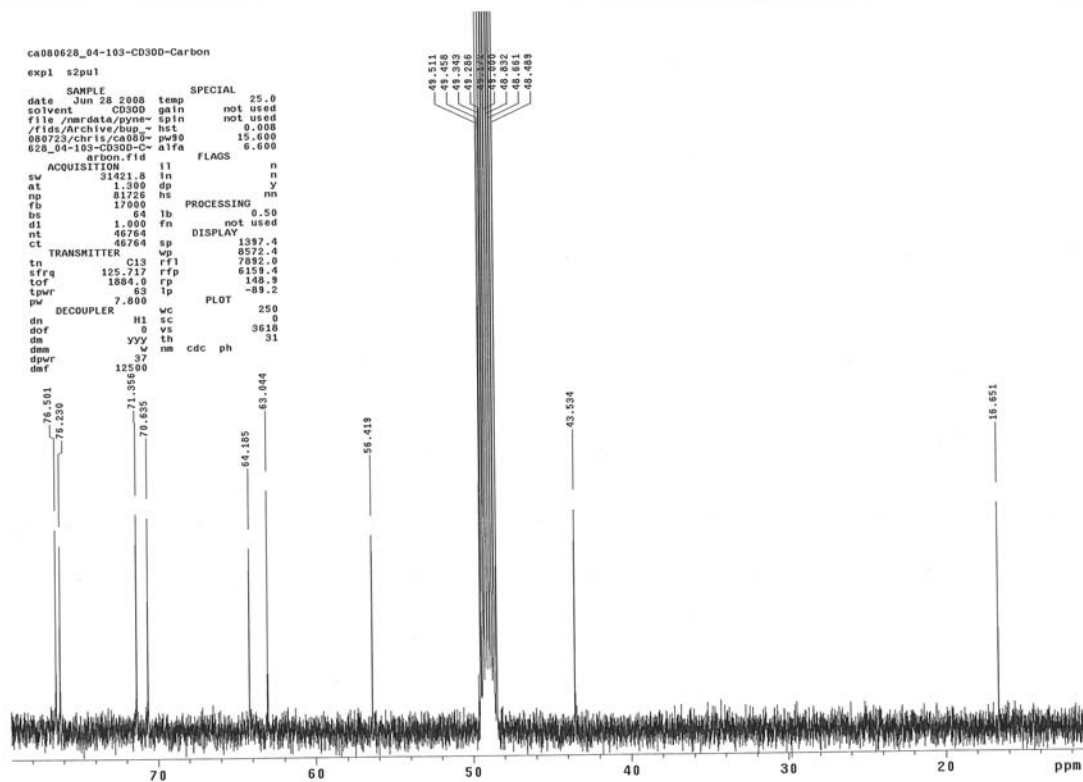

$^{13}\text{C}$  NMR (125 MHz,  $\text{CD}_3\text{OD}$ ) of hyacinthacine  $\text{B}_3$ .

**Table 1.** Comparison of literature  $^{13}\text{C}$  NMR chemical shifts (125 MHz,  $\text{CD}_3\text{OD}$ ) of natural hyacinthacine  $\text{B}_3$  (Lit.) and synthetic **2** (Syn.)

| C  | Lit.* $\delta_{\text{C}}$ | Syn. $\delta_{\text{C}}$ | $\Delta \delta_{\text{C}}$ |
|----|---------------------------|--------------------------|----------------------------|
| 1  | 72.2                      | 71.3                     | -0.9                       |
| 2  | 77.4                      | 76.5                     | -0.9                       |
| 3  | 63.8                      | 63.0                     | -0.8                       |
| 5  | 57.1                      | 56.4                     | -0.7                       |
| 6  | 44.4                      | 43.5                     | -0.9                       |
| 7  | 71.5                      | 70.6                     | -0.9                       |
| 7a | 77.0                      | 76.2                     | -0.8                       |
| 8  | 65.0                      | 64.2                     | -0.8                       |
| 9  | 17.5                      | 16.7                     | -0.8                       |

\* *J. Nat. Prod.*, 2002, 65, 1875

### Experimental for the Synthesis of Purported hyacinthacine B<sub>7</sub>

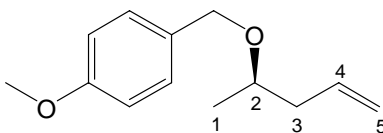

**1-Methoxy-4-[(2*R*)-pent-4-en-2-yloxy]methylbenzene (5b).** Following the general method described for *O*-PMB protection using (*R*)-4-penten-2-ol (1.008 g, 11.703 mmol,  $[\alpha]_D^{24} -5.0$  (neat), > 98% ee, Aldrich), 4-methoxybenzyl chloride (3.15 mL, 23.242 mmol), tetrabutylammonium iodide (0.369 g, 1.161 mmol) and sodium hydride (0.418 g, 17.415 mmol), the title compound was obtained as a colorless oil (2.062 g, 86 %).  $[\alpha]_D^{23} -11.0$  (*c* 1.00, CHCl<sub>3</sub>). Spectroscopic data were the same as those of **5a**.

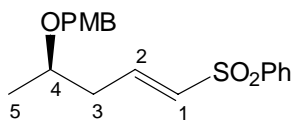

**(1*E*,4*R*)-4-[(4-Methoxybenzyl)oxy]pent-1-en-1-yl phenyl sulfone (6b).** Following the general method described for olefin cross metathesis using **5b** (0.066 g, 0.319 mmol), phenyl vinyl sulfone (0.107 g, 0.638 mmol), Grubbs II catalyst (14 mg, 0.160 mmol) and CH<sub>2</sub>Cl<sub>2</sub> (3 mL), the vinyl sulfone **6b** (0.079 g, 71 %) was obtained as a pale yellow oil.  $[\alpha]_D^{23} +17.5$  (*c* 1.0, CHCl<sub>3</sub>). Spectroscopic data were the same as those of **6a**.

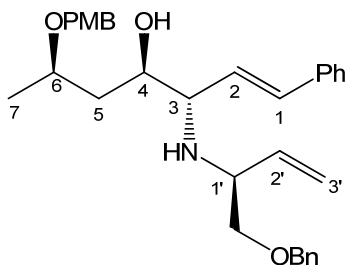

**(3S,4R,6R,E)-3-((S)-1-(Benzyloxy)but-3-en-2-ylamino)-6-(4-methoxybenzyloxy)-1-phenylhept-1-en-4-ol (9b).** Following the general method described for Sharpless asymmetric dihydroxylation and the Petasis reaction using the vinyl sulfone **6b** ( / 0.849 g, 2.451 mmol), potassium ferric cyanide (2.420g, 7.352 mmol), potassium carbonate (1.016 g, 7.352 mmol), methanesulfonamide (0.233 g, 2.451 mmol), potassium osmate dihydrate (5 mg, 0.015 mmol), DHQD-IND (17 mg, 0.0368 mmol), H<sub>2</sub>O (23 mL) and *t*-BuOH (23 mL) in the Sharpless ADH and using (*E*)-2-phenylvinylboronic acid (0.363 g, 2.451 mmol), (2*S*)-1-(benzyloxy)but-3-en-2-amine (0.434 g, 2.451 mmol) and CH<sub>2</sub>Cl<sub>2</sub> (30 mL) in the Petasis reaction gave the title compound (0.491 g, 40 %, 2 steps) as a brown oil. *R*<sub>f</sub> 0.24 (5:95 MeOH/CH<sub>2</sub>Cl<sub>2</sub>).  $[\alpha]_D^{23} +10.6$  (*c* 2.00, CHCl<sub>3</sub>).  $\delta_H$  (500 MHz): 7.36-7.19 (12H, m, ArH), 6.85-6.79 (2H, m, ArH), 6.43 (1H, d, *J* = 16.0 Hz, H1), 6.09 (1H, dd, *J* = 8.5, 16.0 Hz, H2), 5.59 (1H, ddd, *J* = 7.7, 9.9, 17.4 Hz, H2'), 5.22-5.15 (2H, m, H3'), 4.55-4.36 (4H, m, OCH<sub>2</sub>Ph and OCH<sub>2</sub>PMP), 4.02 (dt, *J* = 3.8, 6.3 Hz, H4), 3.88-3.78 (1H, m, H6), 3.77 (3H, s, OCH<sub>3</sub>), 3.24 (1H, dd, *J* = 3.8, 8.5 Hz, H3), 3.50-3.40 (3H, m, H1' and H1''), 1.57 (2H, dd, *J* = 5.7, 6.3 Hz, H5), 1.21 (3H, d, *J* = 6.2 Hz, H7).  $\delta_C$  (125 MHz): 159.2 (ArC), 138.1 (ArC), 137.9 (C2'), 136.9 (ArC), 132.8 (C1), 129.4 (ArC), 130.2 (ArC), 128.4 (ArC), 128.3 (ArC), 128.2 (C2), 127.6 (ArC), 127.5 (ArC), 127.4 (ArC), 126.3 (ArC), 117.9 (C3'), 113.9 (ArC), 75.3 (C6), 73.8 (C4), 73.4 (C1''), 72.9 (OCH<sub>2</sub>Ph), 70.0 (OCH<sub>2</sub>PMP), 62.1 (C3), 57.7 (C1'), 55.2 (OCH<sub>3</sub>), 40.3 (C5), 19.5

(C7). ESIMS  $m/z$  502 (100%)  $[MH]^+$ , HRESIMS found 502.2954, calc for  $C_{32}H_{40}NO_4$ , 502.2957  $[MH]^+$ .

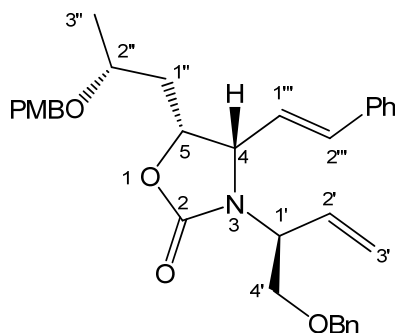

**(4S,5R)-3-((S)-1-(Benzyloxy)but-3-en-2-yl)-5-((R)-2-(4-methoxybenzyloxy)propyl)-4-styryloxazolidin-2-one (10b)**. Following the general method for the synthesis of oxazolidinones using the 1,2-amino alcohol **9b** (0.288 g, 0.574 mmol), triethylamine (160  $\mu$ L, 1.148 mmol), triphosgene (0.085 g, 0.287 mmol) and dry  $CH_2Cl_2$  (20 mL), the title compound (0.163 g, 54%) was obtained as a colorless oil.  $R_f$  0.30 (1:3 EtOAc/petrol).  $[\alpha]_D^{22} +7.1$  ( $c$  5.20,  $CHCl_3$ ).  $\delta_H$  (300 MHz): 7.37-7.19 (12H, m, ArH), 6.89-6.82 (2H, m, ArH), 6.23 (1H, d,  $J = 15.9$  Hz,  $H_{2''''}$ ), 5.99 (1H, dd,  $J = 9.6, 15.9$  Hz,  $H_{1''''}$ ), 5.79 (1H, ddd,  $J = 7.4, 10.3, 17.5$  Hz,  $H_{2'}$ ), 5.25 (1H, d,  $J = 17.3$  Hz,  $H_{3'_{trans}}$ ), 5.17 (1H, d,  $J = 10.3$  Hz,  $H_{3'_{cis}}$ ), 4.67 (1H, dt,  $J = 5.1, 8.7$  Hz, H5), 4.60 (1H, d,  $J = 11.7$  Hz, OCHHPH), 4.49 (1H, d,  $J = 11.4$  Hz, OCHHPMP), 4.48 (1H, d,  $J = 11.7$  Hz, OCHHPH), 4.35-4.27 (1H, m, H4), 4.31 (1H, d,  $J = 11.4$  Hz, OCHHPMP), 4.29-4.21 (1H, m,  $H_{1'}$ ), 3.89-3.78 (1H, m,  $H_{4'_A}$ ), 3.79 (3H, s,  $OCH_3$ ), 3.70-3.63 (1H, m,  $H_{2''}$ ), 3.61 (1H, dd,  $J = 5.2, 10.2$  Hz,  $H_{4'_B}$ ), 2.02 (1H, ddd,  $J = 5.7, 9.0, 14.5$  Hz,  $H_{1''_A}$ ), 1.66-1.57 (1H, m,  $H_{1''_B}$ ), 1.20 (3H, d,  $J = 6.1$  Hz,  $H_{3''}$ ).  $\delta_C$  (75 MHz): 159.2 (ArC), 157.2 (ArC), 137.9 (ArC), 135.5 (ArC),

135.1 (C2''), 133.7 (C2'), 130.6 (ArC), 129.4 (ArC), 128.7 (ArC), 128.5 (ArC), 128.4 (ArC), 128.0 (ArC), 127.8 (ArC), 126.6 (ArC), 124.7 (C1'''), 118.5 (C3'), 113.8 (ArC), 74.9 (C5), 73.0 (OCH<sub>2</sub>Ph), 70.8 (C2'), 69.9 (OCH<sub>2</sub>PMP), 68.9 (C4'), 61.4 (C1'), 56.1 (C4), 55.2 (OCH<sub>3</sub>), 37.3 (C1''), 19.0 (C3''). ESIMS *m/z* 550 (100%) [MNa]<sup>+</sup>, 528 (10%) [MH]<sup>+</sup>, HRESIMS found 528.2845, calc for C<sub>33</sub>H<sub>38</sub>NO<sub>5</sub>, 528.2750 [MH]<sup>+</sup>.

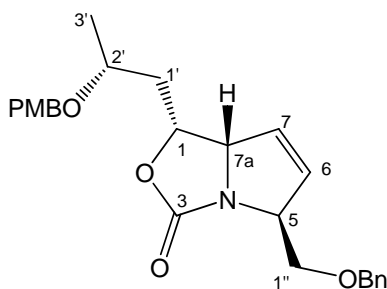

**(1R,5S,7aS)-5-(Benzyloxymethyl)-1-((R)-2-(4-methoxybenzyloxy)propyl)-1,7a-dihydropyrrolo[1,2-c]oxazol-3(5H)-one (11b).** Following the general method for the ring-closing metathesis of oxazolidinones using the oxazolidinone **10b** (0.400 g, 0.759 mmol), the Grubbs II catalyst (32 mg, 0.038 mmol) and CH<sub>2</sub>Cl<sub>2</sub> (3 mL), the title compound (0.280 g, 87 %) was obtained as a yellow oil. *R<sub>f</sub>* 0.45 (1:2 EtOAc/petrol).  $[\alpha]_D^{24}$  -87.6 (*c* 1.00, CHCl<sub>3</sub>). IR  $\nu_{\max}$  (cm<sup>-1</sup>): 2960, 2929, 2858, 1752, 1512, 1247, 1030.  $\delta_H$  (500 MHz): 7.38-7.22 (7H, m, ArH), 6.89-6.86 (2H, m, ArH), 6.04-6.02 (1H, m, H7), 5.86 (1H, dd, *J* = 1.7, 6.1 Hz, H6), 4.87 (1H, dt, *J* = 5.5, 8.4 Hz, H1), 4.82-4.79 (1H, m, H5), 4.70 (1H, dd, *J* = 3.5, 11.8 Hz, H7a), 4.57-4.56 (2H, m, OCH<sub>2</sub>PMP), 4.53 (1H, d, *J* = 11.3 Hz, OCHHPH), 4.35 (1H, d, *J* = 11.3 Hz, OCHHPH), 3.79 (3H, s, OCH<sub>3</sub>), 3.75-3.69 (1H, m, H2'), 3.54 (1H, d, *J* = 5.1 Hz, H1''), 1.96 (1H, ddd, *J* = 5.5, 8.6, 14.1 Hz, H1'<sub>A</sub>), 1.73-1.67 (1H, m, H1'<sub>B</sub>), 1.28 (3H, d, *J* = 6.1 Hz, H3').  $\delta_C$  (125 MHz): 162.3 (ArC), 159.2 (ArC), 137.9 (ArC), 133.2 (C7), 130.4 (ArC), 129.2 (ArC), 128.3 (ArC),

127.8 (C6), 127.6 (ArC), 127.4 (ArC), 113.8 (ArC), 75.8 (C1), 73.2 (OCH<sub>2</sub>PMP), 71.0 (C1''), 70.9 (C2'), 70.1 (OCH<sub>2</sub>Ph), 68.2 (C7a), 66.9 (C5), 55.2 (OCH<sub>3</sub>), 38.7 (C1'), 19.0 (C3'). ESIMS *m/z* 446 (60%) [MNa]<sup>+</sup>, HRESIMS found 446.1938, calc for C<sub>25</sub>H<sub>29</sub>NO<sub>5</sub>Na 446.1943 [MNa]<sup>+</sup>.

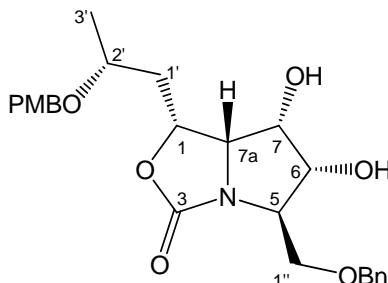

**(1R,5R,6R,7S,7aS)-5-(Benzyloxymethyl)-6,7-dihydroxy-1-((R)-2-(4-methoxybenzyloxy)propyl)tetrahydropyrrolo[1,2-c]oxazol-3(1H)-one (12b).** Following the general method for *syn*-dihydroxylation using the alkene **11b** (0.203 g, 0.480 mmol), *N*-morpholine-*N*-oxide (0.113 g, 0.961 mmol) and potassium osmate dihydrate (9 mg, 0.024 mmol), acetone (4 mL) and H<sub>2</sub>O (2.5 mL), the title compound (0.196 g, 89 %) was obtained as a brown oil. *R<sub>f</sub>* 0.13 (1:1 EtOAc:petrol).  $[\alpha]_D^{24}$  -35.2 (*c* 1.00, CHCl<sub>3</sub>).  $\delta_H$  (500 MHz): 7.39-7.17 (7H, m, ArH), 6.84 (1H, d, *J* = 8.3 Hz, ArH), 4.78 (1H, q, *J* = 7.1 Hz, H1), 4.56 (2H, q, *J* = 11.9 Hz, OCH<sub>2</sub>PMP), 4.51 (1H, d, *J* = 11.4 Hz, OCHHPh), 4.31 (1H, d, *J* = 11.4 Hz, OCHHPh), 4.23-4.18 (1H, m, H7), 3.87-3.85 (1H, m, H6), 3.76 (3H, s, OCH<sub>3</sub>), 3.76-3.70 (1H, m, H5), 3.72-3.65 (1H, m, H1''<sub>A</sub>), 3.70-3.66 (1H, m, H2'), 3.63-3.58 (1H, m, H1''<sub>B</sub>), 3.43 (1H, dd, *J* = 4.1, 6.6 Hz, H7a), 2.35 (1H, dt, *J* = 6.9, 14.0 Hz, H1'<sub>A</sub>), 2.14 (1H, m, H1'<sub>B</sub>), 1.25 (1H, d, *J* = 6.1 Hz, H3').  $\delta_C$  (125 MHz): 162.7 (C3), 159.2 (ArC), 137.9 (ArC), 130.4 (ArC), 129.5 (ArC), 128.4 (ArC), 127.8 (ArC), 127.7 (ArC), 113.8 (ArC), 76.3 (C7), 73.5 (OCH<sub>2</sub>PMP), 73.4 (C1), 72.1 (C6), 71.0 (C2') 70.3

(C1''), 69.8 (OCH<sub>2</sub>Ph), 64.8 (C7a), 62.2 (C5), 55.3 (OCH<sub>3</sub>), 36.2 (C1'), 19.2 (C3').

ESIMS *m/z* 480 (82%) [MH]<sup>+</sup>, HRESIMS found 480.2035, calc for C<sub>25</sub>H<sub>31</sub>NO<sub>7</sub>Na 480.1998 [MNa]<sup>+</sup>.

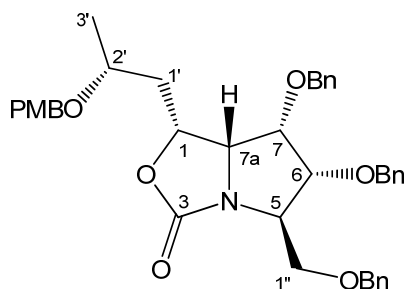

**(1R,5R,6R,7S,7aR)-6,7-Bis(benzyloxy)-5-(benzyloxymethyl)-1-((R)-2-(4-methoxybenzyloxy)propyl)tetrahydropyrrolo[1,2-c]oxazol-3(1H)-one (13b).** Following the general method for bisbenzylation using diol **12b** (0.160 g, 0.350 mmol), benzyl bromide (0.170 mL, 0.239 mmol) and tetrabutylammonium iodide (13 mg, 0.035 mmol), sodium hydride (50% dispersion in mineral oil, 50 mg, 25 mg NaH, 1.050 mmol) and THF (25 mL), the title compound (0.210 g, 94 %) was obtained as a colorless oil. *R<sub>f</sub>* 0.72 (1:1 EtOAc:petrol).  $[\alpha]_D^{24} +2.4$  (*c* 1.00, CHCl<sub>3</sub>).  $\delta_H$  (500 MHz): 7.36-7.20 (15H, m, ArH), 7.14 (2H, d, *J* = 8.6 Hz, ArH), 6.82 (2H, d, *J* = 8.6 Hz, ArH), 5.02 (1H, d, *J* = 11.5 Hz, OCHHAr), 4.74 (1H, dd, *J* = 7.3, 14.2 Hz, H1), 4.61-4.37 (6H, m, 6 x OCHHAr), 4.19 (1H, d, *J* = 11.6 Hz, OCHHAr), 4.16 (1H, dd, *J* = 2.8, 8.3 Hz, H6), 3.96 (1H, dt, *J* = 3.0, 8.1 Hz, H5), 3.82 (1H, t, *J* = 2.4 Hz, H7), 3.75 (3H, s, OCH<sub>3</sub>), 3.74 (1H, dd, *J* = 2.9, 10.2 Hz, H1''<sub>A</sub>), 3.60 (1H, dd, *J* = 2.9, 10.2 Hz, H1''<sub>B</sub>), 3.59-3.56 (1H, m, H2'), 3.52 (1H, dd, *J* = 2.3, 7.5 Hz, H7a), 2.24 (1H, ddd, *J* = 6.0, 7.4, 13.9 Hz, H1'<sub>A</sub>), 1.90 (1H, dt, *J* = 6.2, 13.9 Hz, H1'<sub>B</sub>), 1.16 (3H, d, *J* = 6.2 Hz, H3').  $\delta_C$  (125 MHz): 162.0 (C3), 159.2 (ArC), 138.2 (ArC), 137.9 (ArC), 137.5 (ArC), 130.5 (ArC), 129.4 (ArC), 128.5 (ArC), 128.3

(ArC), 128.3 (ArC), 128.0 (ArC), 127.7 (ArC), 127.6 (ArC), 127.6 (ArC), 127.3 (ArC), 127.0 (ArC), 113.7 (ArC), 83.3 (C6), 76.9 (C7), 73.3 (OCH<sub>2</sub>Ar), 73.2 (OCH<sub>2</sub>Ar), 72.9 (C1), 72.7 (OCH<sub>2</sub>Ar), 70.8 (C2), 69.7 (OCH<sub>2</sub>Ar), 69.2 (C1''), 64.0 (C7a), 60.8 (C5), 55.2 (OCH<sub>3</sub>), 35.2 (C1'), 18.9 (C3').

ESIMS *m/z* 660 (100%) [MNa]<sup>+</sup>, HRESIMS found 660.2987, calc for C<sub>39</sub>H<sub>43</sub>NO<sub>7</sub>Na, 660.2937 [MNa]<sup>+</sup>.

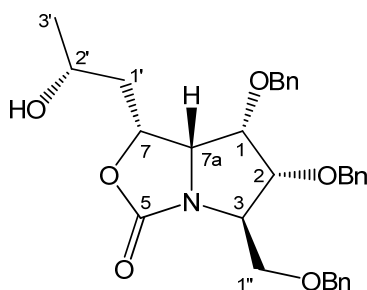

**(1R,5R,6R,7S,7aR)-6,7-Bis(benzyloxy)-5-(benzyloxymethyl)-1-((R)-2-**

**hydroxypropyl)-tetrahydropyrrolo[1,2-c]oxazol-3(1H)-one (14b).** Following the general method for PMB deprotection using **13b** (0.173 g, 0.272 mmol), 2,3-dichloro-5,6-dicyanobenzoquinone (DDQ) (0.136 g, 0.598 mmol), CH<sub>2</sub>Cl<sub>2</sub> (10 mL) and H<sub>2</sub>O (1.25 mL) the title compound (0.130 g, 92 %) was obtained as a yellow oil. *R<sub>f</sub>* 0.33 (2.5:97.5 MeOH:CH<sub>2</sub>Cl<sub>2</sub>). [α]<sub>D</sub><sup>24</sup> +14.3 (*c* 1.00, CHCl<sub>3</sub>). δ<sub>H</sub> (500 MHz): 7.35-7.17 (15H, m, ArH), 5.01 (1H, d, *J* = 11.4 Hz, OCHHPh), 4.74 (1H, dd, *J* = 7.5, 13.5 Hz, H1), 4.64 (1H, d, *J* = 11.8 Hz, OCHHPh), 4.56 (1H, d, *J* = 11.8 Hz, OCHHPh), 4.51 (1H, d, *J* = 11.4 Hz, OCHHPh), 4.48 (1H, d, *J* = 11.7 Hz, OCHHPh), 4.38 (1H, d, *J* = 11.7 Hz, OCHHPh), 4.27 (1H, dd, *J* = 1.7, 7.8 Hz, H6), 4.02-4.01 (1H, m, H7), 4.00-3.96 (1H, m, H5), 3.89-3.82 (1H, dd, *J* = 6.1, 11.2 Hz, H2'), 3.74 (1H, dd, *J* = 3.4, 10.4 Hz, H1''<sub>A</sub>), 3.74-3.71 (1H, m, H7a), 3.58 (1H, dd, *J* = 2.4, 10.4 Hz, H1''<sub>B</sub>), 2.09 (1H, dt, *J* = 7.6, 14.6 Hz,



H1'<sub>A</sub>), 1.81 (1H,  $J = 4.9, 14.6$  Hz, H1'<sub>B</sub>), 1.10 (3H, d,  $J = 6.2$  Hz, H3').  $\delta_C$  (125 MHz): 161.9 (C3), 137.9 (ArC), 137.7 (ArC), 137.3 (ArC), 128.4 (ArC), 128.2 (ArC), 128.2 (ArC), 127.9 (ArC), 127.6 (ArC), 127.6 (ArC), 127.5 (ArC), 127.3 (ArC), 127.1 (ArC), 83.1 (C6), 76.5 (C7), 73.9 (C1), 73.1 (OCH<sub>2</sub>Ph), 73.1 (OCH<sub>2</sub>Ph), 72.6 (OCH<sub>2</sub>Ph), 69.1 (C1''), 65.5 (C2'), 64.0 (C7a), 60.8 (C5), 37.7 (C1'), 23.0 (C3'). ESIMS  $m/z$  540 (100%) [MH]<sup>+</sup>, 518 (40%) [MNa]<sup>+</sup>, HRESIMS found 518.2532, calc for C<sub>31</sub>H<sub>36</sub>NO<sub>6</sub>, 518.2543 [MH]<sup>+</sup>.

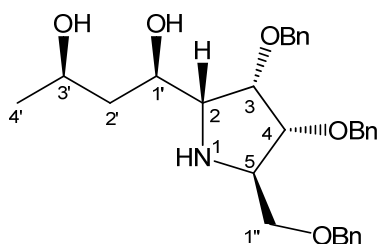

**(1R,3R)-1-((2R,3S,4R,5R)-3,4-Bis(benzyloxy)-5-(benzyloxymethyl)pyrrolidin-2-yl)butane-1,3-diol (15b).** Following the general method for the hydrolysis of oxazolidinones using **14b** (0.105 g, 0.203 mmol), sodium hydroxide (0.016 g, 0.406 mmol) and EtOH (4 mL), the title compound (0.090 g, 91 %) was obtained as a light yellow oil.  $R_f$  0.08 (2.5:97.5 MeOH:CH<sub>2</sub>Cl<sub>2</sub>).  $[\alpha]_D^{24} +14.2$  ( $c$  1.00, CHCl<sub>3</sub>).  $\delta_H$  (500 MHz): 7.39-7.22 (15H, ArH), 4.88 (1H, d,  $J = 11.4$  Hz, OCHHPh), 4.61 (1H, d,  $J = 11.9$  Hz, OCHHPh), 4.56 (1H, d,  $J = 11.4$  Hz, OCHHPh), 4.53 (1H, d,  $J = 11.9$  Hz, OCHHPh), 4.50 (1H, d,  $J = 11.9$  Hz, OCHHPh), 4.44 (1H, d,  $J = 11.9$  Hz, OCHHPh), 4.17 (1H, t,  $J = 4.2$  Hz, H3), 4.06 (1H, ddd,  $J = 2.9, 7.7, 10.2$  Hz, H1'), 4.02 (1H, ddd,  $J = 2.7, 6.2, 8.9$  Hz, H3'), 3.89 (1H, dd,  $J = 4.2, 6.5$  Hz, H4), 3.54 (1H, dd,  $J = 5.6, 11.5$  Hz, H1''<sub>A</sub>), 3.49-3.46 (1H, m, H5), 3.48-3.46 (1H, m, H1''<sub>B</sub>), 3.02 (1H, dd,  $J = 4.2, 7.7$  Hz, H2), 1.73 (1H,

dt,  $J = 2.6, 14.3$  Hz, H2' <sub>A</sub>), 1.44 (1H, ddd,  $J = 8.9, 10.2, 14.3$  Hz, H2' <sub>B</sub>), 1.16 (3H, d,  $J = 6.2$  Hz, H4').  $\delta_C$  (125 MHz): 138.0 (ArC), 137.9 (ArC), 137.8 (ArC), 128.5 (ArC), 128.4 (ArC), 128.3 (ArC), 128.0 (ArC), 128.0 (ArC), 127.8 (ArC), 127.7 (ArC), 127.7 (ArC), 127.6 (ArC), 81.1 (C4), 79.0 (C3), 73.4 (OCH<sub>2</sub>Ph), 73.2 (OCH<sub>2</sub>Ph), 72.7 (OCH<sub>2</sub>Ph), 72.6 (C1'), 70.1 (C1''), 68.1 (C3'), 62.9 (C2), 60.2 (C5), 42.4 (C2'), 23.6 (C4'). ESIMS  $m/z$  492 (100%) [MH]<sup>+</sup>, HRESIMS found 492.2765, calc for C<sub>30</sub>H<sub>38</sub>NO<sub>5</sub>, 492.2750 [MH]<sup>+</sup>.

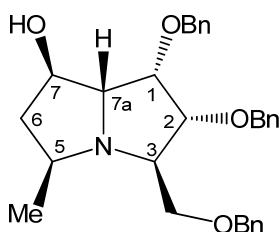

**(1R,3S,5R,6R,7S,7aR)-6,7-bis(benzyloxy)-5-(benzyloxymethyl)-3-methylhexahydro-1H-pyrrolizin-1-ol (17)**. Following the general method for mesylation-cyclization using **15b** (0.056 g, 0.115 mmol), triethylamine (79  $\mu$ L, 0.573 mmol), MeSO<sub>2</sub>Cl (8.9  $\mu$ L, 0.115 mmol) and dry CH<sub>2</sub>Cl<sub>2</sub> (10 mL), the title compound (0.028 g, 51 %) was obtained as a colorless oil.  $R_f$  0.19 (4:1 EtOAc/petrol).  $[\alpha]_D^{25} +7.2$  ( $c$  1.00, CHCl<sub>3</sub>).  $\delta_H$  (500 MHz): 7.39-7.18 (15H, m, ArH), 4.74 (1H,  $J = 11.8$  Hz, OCHHPh), 4.68 (1H, dt, 6.6, 9.1, H7), 4.56-4.48 (5H, m, 5 x OCHHPh), 4.06 (1H, dd,  $J = 4.0, 5.4$  Hz, H1), 3.93 (1H, dd,  $J = 4.0, 6.0$  Hz, H2), 3.45 (1H, dd,  $J = 4.7, 9.8$  Hz, H8<sub>A</sub>), 3.42 (1H, dd,  $J = 5.4, 6.3$  Hz, H7a), 3.42 (1H, dd,  $J = 5.3, 9.8$  Hz, H8<sub>B</sub>), 3.09 (1H, dd,  $J = 5.3, 10.9$  Hz, H3), 3.07-3.01 (1H, m, H5), 2.27 (1H, ddd,  $J = 5.4, 6.9, 12.1$  Hz, H6<sub>A</sub>), 1.62-1.5 (1H, m, H6<sub>B</sub>), 1.14 (3H, d,  $J = 6.3$  Hz, CH<sub>3</sub>).  $\delta_C$  (125 MHz): 138.6 (ArC), 138.4 (ArC) 138.2 (ArC), 128.4 (ArC), 128.3 (ArC), 128.3 (ArC), 127.8 (ArC), 127.7 (ArC), 127.6 (ArC), 127.6 (ArC), 127.6 (ArC), 127.5

(ArC), 81.7 (C2), 77.6 (C1), 73.3 (OCH<sub>2</sub>Ph), 73.0 (C7a), 73.0 (OCH<sub>2</sub>Ph), 72.3 (OCH<sub>2</sub>Ph), 71.7 (C8), 71.1 (C7), 68.1 (C3), 62.1 (C5), 43.8 (C6), 22.1 (C9). ESIMS  $m/z$  474 (100%) [MH]<sup>+</sup>, HRESIMS found 474.2665, calc for C<sub>30</sub>H<sub>36</sub>NO<sub>4</sub>, 474.2644 [MH]<sup>+</sup>.

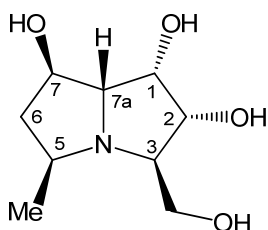

**(1*S*,2*R*,3*S*,5*R*,7*R*,7*aR*)-3-(Hydroxymethyl)-5-methylhexahydro-1*H*-pyrrolizine-1,2,7-triol (putative hyacinthacine B<sub>7</sub>) (3).** Following the general method for the hydrolysis of benzyl ethers using the cyclized product **17** (27 mg, 0.059 mmol), PdCl<sub>2</sub> (16 mg, 0.088 mmol), MeOH (2 mL) and H<sub>2</sub> (in balloon), the title compound (10 mg, 84 %) was obtained as a colorless film.  $[\alpha]_D^{24} + 31.2$  ( $c$  0.20, CHCl<sub>3</sub>).  $\delta_H$  (500 MHz, D<sub>2</sub>O): 4.60 (1H, ddd,  $J = 5.8, 7.0, 9.2$  Hz, H7), 4.13 (1H, app. t,  $J = 4.0$  Hz, H1), 4.03 (1H, dd,  $J = 4.0, 9.1$  Hz, H2), 3.74 (1H, dd,  $J = 4.9, 11.7$  Hz, H8<sub>β</sub>), 3.70 (1H, dd,  $J = 4.9, 11.7$  Hz, H8<sub>α</sub>), 3.32 (1H, dd,  $J = 4.0, 5.8$  Hz, H7a), 3.06-2.97 (1H, m, H5), 2.81 (1H, app. dd,  $J = 4.9, 9.1$  Hz, H3), 2.38 (1H, ddd,  $J = 5.0, 7.0, 12.2$  Hz, H6<sub>β</sub>), 1.60 (1H, ddd,  $J = 9.3, 11.0, 12.2$  Hz, H6<sub>α</sub>), 1.17 (1H, d,  $J = 6.3$  Hz, H9).  $\delta_H$  (125 MHz, D<sub>2</sub>O): 78.1 (C2), 73.6 (C1), 71.8 (C3), 71.3 (C7), 75.4 (C7a), 65.6 (C8), 65.2 (C5), 46.2 (C6), 22.5 (C9). ESIMS  $m/z$  204 ([M+H]<sup>+</sup>), HRESIMS found 204.1319, calc for C<sub>9</sub>H<sub>18</sub>NO<sub>4</sub>, 204.1236 ([M+H]<sup>+</sup>).

$^1\text{H}$  NMR (500 MHz,  $\text{D}_2\text{O}$ ) of hyacinthacine B<sub>7</sub>

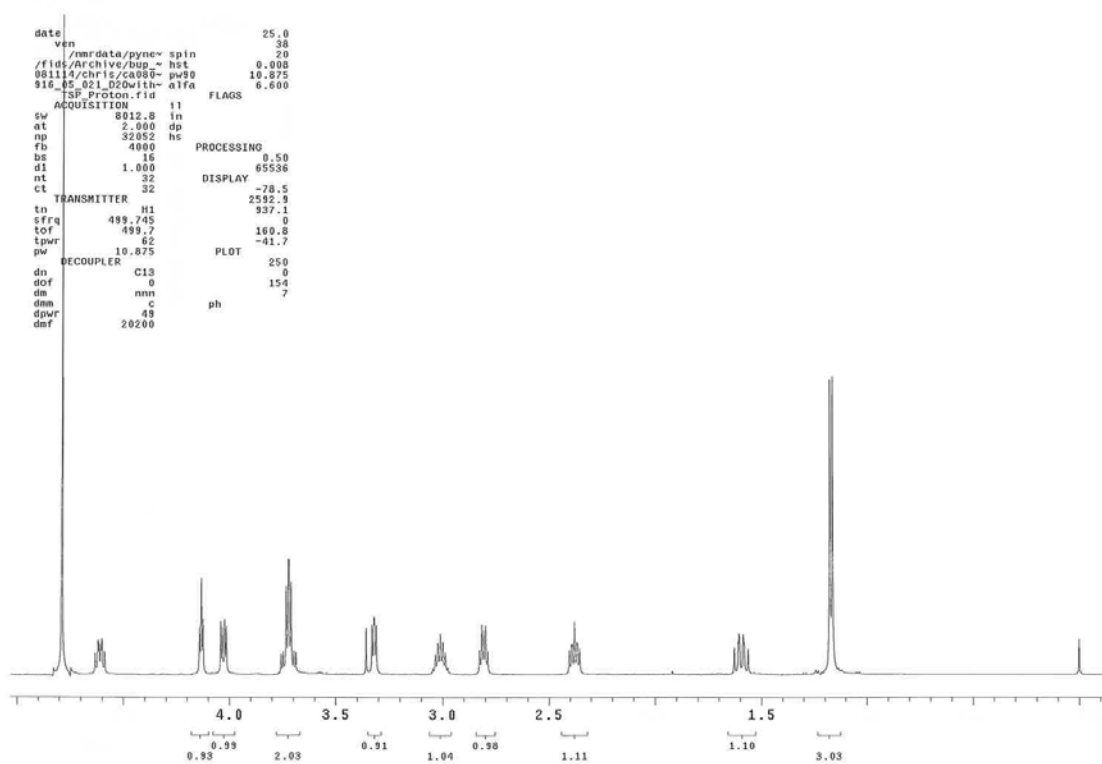

$^{13}\text{C}$  NMR (500 MHz,  $\text{D}_2\text{O}$ ) of hyacinthacine B<sub>7</sub>

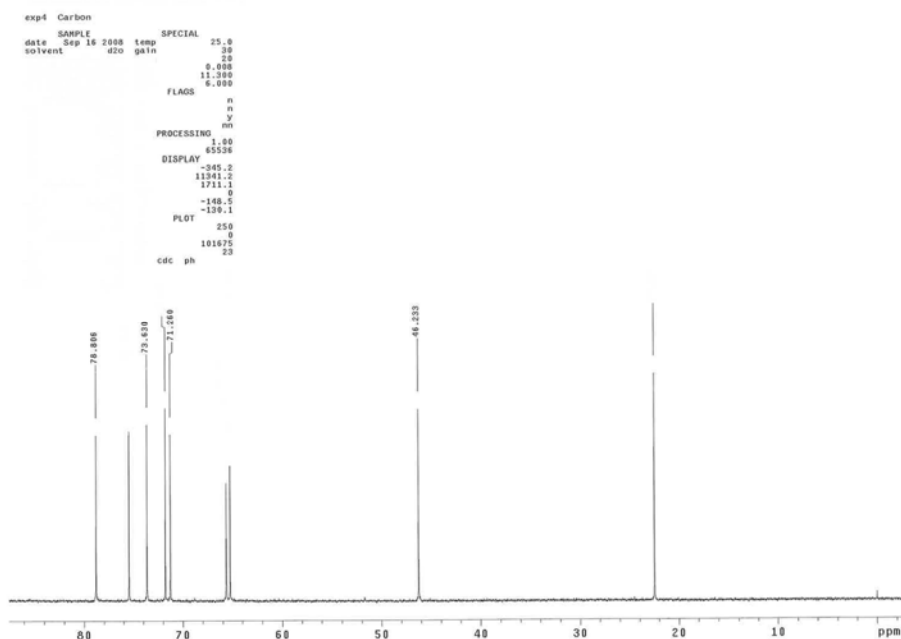

NOESY (500 MHz, D<sub>2</sub>O) of hyacinthacine B<sub>7</sub> (correlations between H-5 and H-7 are shown inside the square)

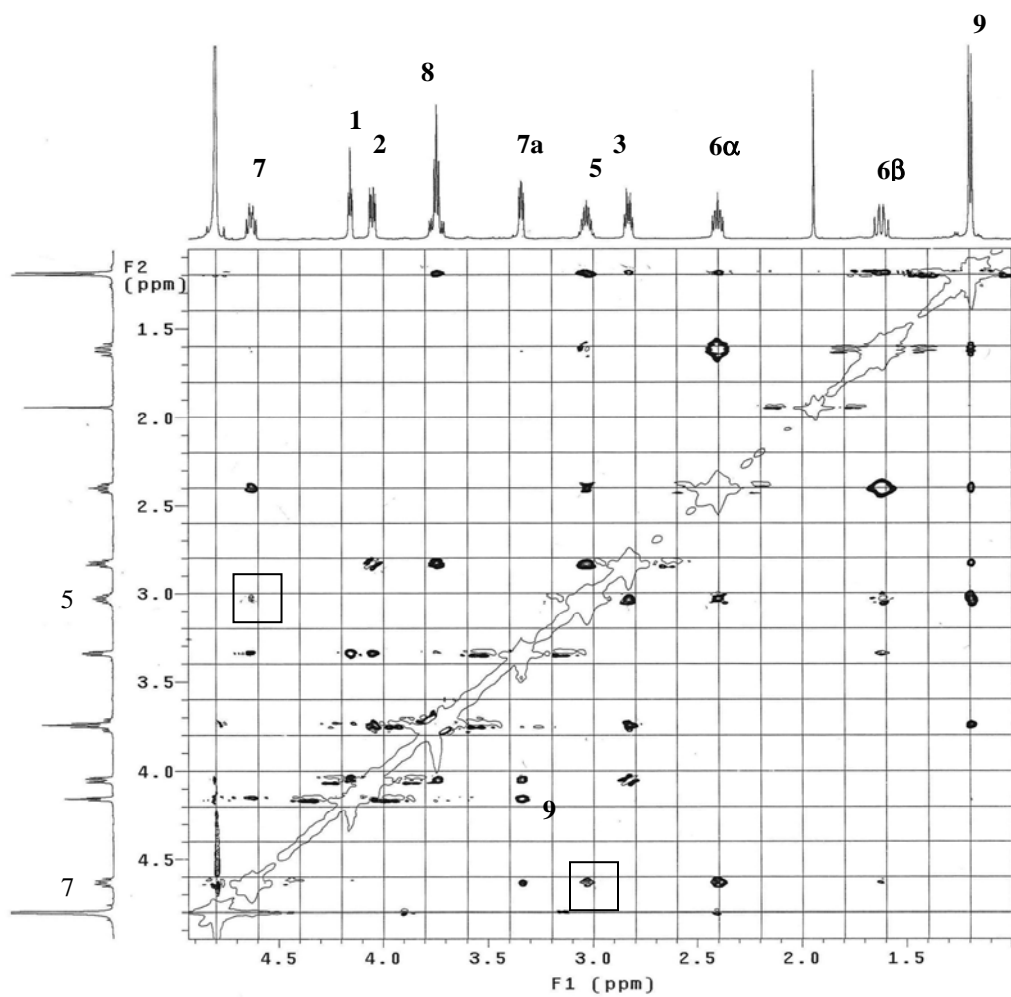

**Table 2.** Comparison of literature  $^1\text{H}$  NMR chemical shifts (500 MHz,  $\text{D}_2\text{O}$ ) of natural hyacinthacine  $\text{B}_7$  (Lit.) and synthetic **3** (Syn.)

| H          | $\delta_{\text{H}}$ (Lit.)** | Mult., $J(\text{Hz})$ (Lit.)** | $\delta_{\text{H}}$ (syn.) | Mult., $J(\text{Hz})$ (syn.) |
|------------|------------------------------|--------------------------------|----------------------------|------------------------------|
| 1          | 4.35                         | t (4.4)                        | 4.13                       | t (3.9)                      |
| 2          | 3.97                         | dd (4.4, 7.6)                  | 4.03                       | dd (3.9, 9.0)                |
| 3          | 3.29                         | ddd (7.6, 5.5, 3.5)            | 2.81                       | ddd (4.9, 4.9, 9.0)          |
| 5          | 3.22                         | m                              | 3.01                       | m                            |
| 6 $\alpha$ | 1.68                         | m                              | 1.60                       | m                            |
| 6 $\beta$  | 2.16                         | m                              | 2.38                       | m                            |
| 7          | 4.50                         | m                              | 4.61                       | m                            |
| 7a         | 3.45                         | dd (4.4, 7.6)                  | 3.32                       | dd (3.9, 5.9)                |
| 8 $\alpha$ | 3.57                         | dd (5.5, 11.5)                 | 3.70                       | dd (4.9, 11.5)               |

\*\* *J. Nat. Prod.*, **2007**, 70, 993

**Table 3.** Comparison of literature  $^{13}\text{C}$  NMR chemical shifts (125 MHz,  $\text{D}_2\text{O}$ ) of natural hyacinthacine  $\text{B}_7$  (Lit.) and synthetic **3** (Syn.)

| C  | Lit. $\delta_{\text{C}}$ ** | Syn. $\delta_{\text{C}}$ | $\Delta \delta_{\text{C}}$ |
|----|-----------------------------|--------------------------|----------------------------|
| 1  | 77.9                        | 73.6                     | -4.3                       |
| 2  | 74.9                        | 78.1                     | +3.2                       |
| 3  | 66.2                        | 71.8                     | +5.6                       |
| 5  | 57.7                        | 65.2                     | +7.5                       |
| 6  | 45.2                        | 46.2                     | +1.0                       |
| 7  | 76.5                        | 71.3                     | -5.2                       |
| 7a | 69.9                        | 75.4                     | +5.5                       |
| 8  | 66.8                        | 65.6                     | -1.2                       |
| 9  | 18.4                        | 22.5                     | +4.1                       |

\*\* *J. Nat. Prod.*, **2007**, 70, 993
